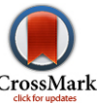

# Anaesthetic Tricaine Acts Preferentially on Neural Voltage-Gated Sodium Channels and Fails to Block Directly Evoked Muscle Contraction

Seetharamaiah Attili, Simon M. Hughes\*

Randall Division of Cell and Molecular Biophysics, Guy's Campus, King's College London, London, United Kingdom

## Abstract

Movements in animals arise through concerted action of neurons and skeletal muscle. General anaesthetics prevent movement and cause loss of consciousness by blocking neural function. Anaesthetics of the amino amide-class are thought to act by blockade of voltage-gated sodium channels. In fish, the commonly used anaesthetic tricaine methanesulphonate, also known as 3-aminobenzoic acid ethyl ester, metacaine or MS-222, causes loss of consciousness. However, its role in blocking action potentials in distinct excitable cells is unclear, raising the possibility that tricaine could act as a neuromuscular blocking agent directly causing paralysis. Here we use evoked electrical stimulation to show that tricaine efficiently blocks neural action potentials, but does not prevent directly evoked muscle contraction. Nifedipine-sensitive L-type  $Ca_v$  channels affecting movement are also primarily neural, suggesting that muscle  $Na_v$  channels are relatively insensitive to tricaine. These findings show that tricaine used at standard concentrations in zebrafish larvae does not paralyse muscle, thereby diminishing concern that a direct action on muscle could mask a lack of general anaesthesia.

**Citation:** Attili S, Hughes SM (2014) Anaesthetic Tricaine Acts Preferentially on Neural Voltage-Gated Sodium Channels and Fails to Block Directly Evoked Muscle Contraction. PLoS ONE 9(8): e103751. doi:10.1371/journal.pone.0103751

**Editor:** Steven Barnes, Dalhousie University, Canada

**Received:** May 16, 2014; **Accepted:** June 30, 2014; **Published:** August 4, 2014

**Copyright:** © 2014 Attili, Hughes. This is an open-access article distributed under the terms of the Creative Commons Attribution License, which permits unrestricted use, distribution, and reproduction in any medium, provided the original author and source are credited.

**Data Availability:** The authors confirm that all data underlying the findings are fully available without restriction. All relevant data are within the paper and its Supporting Information files.

**Funding:** SMH is a Medical Research Council Scientist (www.mrc.ac.uk) with Programme Grant G1001029 support, which funded this study. Additional support to SMH that contributed to the work came from a Biotechnology and Biological Sciences Research Council (www.bbsrc.ac.uk) project grant BB/K010115/1 and UK-India Partnering Award grant. The funders had no role in study design, data collection and analysis, decision to publish, or preparation of the manuscript.

**Competing Interests:** The authors have declared that no competing interests exist.

\* Email: simon.hughes@kcl.ac.uk

## Introduction

In the 18<sup>th</sup> century, Luigi Galvani laid the foundations of biophysics by discovering that electrical stimuli can trigger muscular contraction, transmit to muscles via nerves and are also generated by animals themselves [1]. Since that time, neurons and skeletal muscle have been shown to be electrically excitable; electrical action potentials in neurons trigger further action potentials in muscle fibres that lead to contraction. Voltage gated ion channels are key to the generation of action potentials (reviewed in [2]). Neuron and muscle have subtly different electrical properties, each employing distinct voltage-gated channels. Normally, an action potential propagates rapidly along the neural axon, stimulating the release of the neurotransmitter, which in turn elicits an action potential in the muscle fibre plasma membrane. This second action potential propagates via the transverse-tubule system deep into the fibre, where the dihydropyridine receptor (DHPR) acts as a voltage sensor that causes release of  $Ca^{++}$  from sarcoplasmic reticulum into the cytoplasm. Increased cytoplasmic  $Ca^{++}$  concentration promotes actomyosin contractility [3,4]. Following Galvani, muscle contraction can be directly activated by external electric stimulation that triggers action, controlling not only immediate contraction events but also longer term muscle gene expression [5–8].

Excitability arises from the sequential opening and closing of voltage-gated  $Na^+$ ,  $Ca^{++}$  and  $K^+$  channels [9,10]. In adult skeletal

muscle, voltage-gated  $Na^+$  ( $Na_v$ ) channels initiate the action potential, rapidly activate and inactivate in a few milliseconds and have been widely studied [2,11]. In embryonic tissues, however, voltage-gated  $Ca^{++}$  ( $Ca_v$ ) channels can make a significant contribution to the action potential [12–14]. Additionally, L-type voltage-gated  $Ca_v1.1$  channels play an essential role in calcium release in skeletal muscle through their role as components of the DHPR, which provides a voltage-sensitive mechanical link that triggers release of  $Ca^{++}$  from the sarcoplasmic reticulum [12,15]. Drugs that target voltage-gated channels have proved invaluable in the clinic, but often have side effects due to their ability to bind more than one channel type [16]. Local anaesthetics, for example, inhibit the generation of neural action potentials by blocking the flow of ions through voltage-gated ion channels [17–19]. However, compounds such as lidocaine and bupivacaine can have side effects through, for example, cardiac depression.

The larvae of the zebrafish *Danio rerio* offer many advantages for drug screening and investigating the relationship between ion channel expression and nerve and muscle function *in vivo* [20,21]. The practical use of zebrafish often involves, however, the use of tricaine, which is a rapidly reversible general anaesthetic that suppresses movement and thus permits visualisation and manipulation of the organism. Tricaine methanesulphonate (also known as 3-aminobenzoic acid ethyl ester or MS-222) is a preferred drug for aquatic anaesthesia in Norway [22] and in zebrafish experimen-

tation by the U.K. Home Office [23] and is the only drug approved for use in fish by U.S. Food and Drug Administration ([www.accessdata.fda.gov/scripts/animaldrugsatfda/](http://www.accessdata.fda.gov/scripts/animaldrugsatfda/)). Previous reports have shown a suppressive effect of tricaine on zebrafish peripheral and central nervous system [24–26], but also adverse effects on physiology (summarised in [22]). Tricaine, at the normal concentrations used, has little effect on embryonic cardiac contractility, but the heart becomes more sensitive as animals mature [27]. The molecular and cellular targets of tricaine in zebrafish are not fully characterised. This is particularly important because the use of tricaine has recently been questioned on the grounds that fish sense and choose to avoid tricaine [23,28]. It would be of great concern if tricaine were to act directly to paralyse skeletal muscle, thereby preventing movement, as this might mask a lack of general anaesthesia.

Local anaesthetics of the amino amide class, to which tricaine belongs, are known to inhibit certain mammalian Na<sub>v</sub> channels e.g. [29]. Such channels are generally composed of alpha and beta subunits and are primarily defined by their large alpha subunit, which contains the voltage-sensing domain [2]. The zebrafish sodium channel (*scn*) gene family consists of four sets of duplicated alpha subunit genes. *scn1a* and *scn1lab* form the Na<sub>v</sub>1.1 channels expressed in cardiac muscle [30]. *scn4aa* and *scn4ab* contribute to Na<sub>v</sub>1.4 channels and are expressed in skeletal muscle [30–32]. The expression of *scn12aa* and *scn12ab* (putatively forming Na<sub>v</sub>1.5 channels) is transient in zebrafish muscle [31], but in mouse *Scn5a* is expressed in neonatal skeletal muscle and limbic system and in adult muscle after denervation [33]. *scn8aa* and *scn8ab* (Na<sub>v</sub>1.6 channels) are expressed in brain eye, spinal cord, retina, and peripheral nervous system [30,31,34]. The zebrafish Na<sub>v</sub> channels targeted by tricaine are unclear.

Whether amino amide anaesthetics also inhibit zebrafish Ca<sub>v</sub> channels is unknown, but such effects have been reported in other species [35–38]. Ca<sub>v</sub> channels have similarities to Na<sub>v</sub> channels, in that their alpha subunits have clear structural and functional similarities [39]. Zebrafish somites make the first skeletal muscle and express L-type voltage gated calcium channels *cacna1sa* (CaV1.1)[40]. In contrast, the P/Q-type *cacna1a* is expressed in brain, neuronal cells and heart [40]. Thus, the channels and cell types inhibited by tricaine are not fully characterised.

We set out to investigate the tissue target(s) of tricaine in the zebrafish, particularly in muscle. We report the impact of tricaine on zebrafish skeletal muscle at early developmental stages. We also studied the impact of nifedipine, an L-type Ca<sup>2+</sup> channel antagonist. Our findings show that, at the normal concentrations used for anaesthesia, tricaine does not prevent muscle contraction or interfere with excitation-contraction coupling.

## Materials and Methods

### Animals and Reagents

*Danio rerio*, either Tübingen wild type or *chrnd*<sup>sb13</sup> (here called 'fixe') mutants [41] maintained on Tübingen background, were reared at 28.5°C according the standard procedures [42]. All experiments were performed at age of 3–3.5 days post-fertilization (dpf). Stock aliquots (2 ml) of 16 mM Tricaine (3-aminobenzoic acid ethyl ester methanesulphonate) in double distilled water at pH 7 were stored at -20°C. Agarose (Sigma Life Sciences) 2% in fish water was prepared and stored in fridge at 4°C. Aliquots (10 µl) of Nifedipine (Sigma-Aldrich) in dimethylsulfoxide (DMSO) at stock concentration of 100 mM were stored at -20°C. Tricaine and Nifedipine were thawed at room temperature each day of experiment prior to dilution.

### Electrical Stimulation

Fish larvae were subjected electrical stimulation at room temperature using a custom-built electric stimulation set-up (ESS) (Fig. 1A). To minimize damage to the fish, the ESS consists of two silver electrodes (0.5 mm, 99.9%, Arcos Organics, New Jersey, U.S.A.) arrayed parallel and 10 mm apart passing through the drilled holes of a 6-well tissue culture plate or a 60 mm petri dish. Chambers with electrodes were filled with 2% agarose gel, such that the silver electrodes are completely within the gel. A circular well of volume 0.5 mL was created by removing the agarose in the centre of the chamber between the two electrodes. Fish are placed carefully into the well with desired orientation. Care was taken not to expose the electrodes to the fish swimming in the well. The electrodes are connected to a stimulator (Grass S-88, Grass Instruments, U.S.A) that generated square wave pulse trains of indicated lengths. Polarity of electrodes was reversed between pulse trains to avoid electrolysis. A range of stimulation regimes was tested, with the aim of attaining a brief twitch response, and all experiments shown used a train of 200 20 V pulses, with 0.5 ms pulse duration (100 ms total train duration) once every 5 seconds (Fig. 1A).

### Drug treatments

For wash-out, fish were later transferred to a dish containing fresh fish water and were left there for over 30 minutes. Care was taken to exchange the fish water five times to remove residual tricaine.

### Data capture and analysis

Observations were made using a dissecting microscope (Leica MZ 16F, Germany). All videos were recorded using Olympus (DP70) camera with DP Controller software at a frame rate of 60 frames per second in total time of 25 seconds.

Fish tail displacement "d" was measured at the level of the last somite by superimposing images from video. Two images, before and after the onset of stimulation, were overlaid using Adobe Photoshop by false-colouring one image red and converting it to transparent mode.

### Ethics Statement

Fish were bred and experiments performed under licences from the UK Home Office and conform to all institutional, national and EU guidelines.

## Results

The performance of ESS was tested at a range of voltage and pulse train parameters to define a stimulation regime that was not toxic to the fish yet triggered motility. The response of fish to the external stimulus was immediate oscillatory swimming movement with the appearance of an escape response (Movie S1). Escape responses are under neural control either at spinal or higher levels [43]. Evoked movement was quantified by measuring tail tip displacement at the level of the last somite upon stimulation and was >1 mm in sentient fish (Fig. 1B,C). To determine whether electrical stimulation also acts directly on muscle cells, *fixe* mutant larvae, which lack functional acetylcholine receptors [41], were stimulated and gave a single strong contraction to each pulse train that subsequently relaxed (Movie S1). Maximal tail displacement was about 0.17 mm (Fig. 1D). Thus, electric stimulation evokes muscle fibre contraction directly.

Amino amide anaesthetics are known to hinder the generation of action potentials by blocking diffusion of ions through voltage-gated channels within excitable cells, thereby inhibiting the

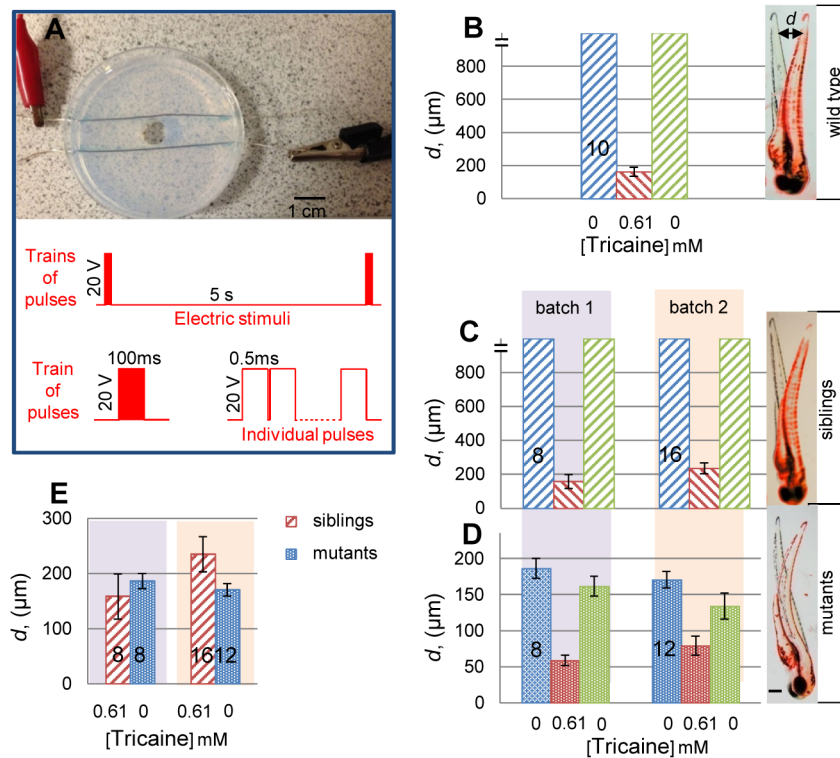

**Figure 1. Tricaine fails to block evoked muscle contractility.** **A.** The electrical stimulation set-up (ESS). Fish are placed within the central well aligned, when spontaneous motility permits, with their anteroposterior axis perpendicular to the electrodes. Schematic of the electric stimulus regime is shown below. **B-D.** Tail displacement ( $d$ ) in embryos from wild type (B) or a *fixe* heterozygote incross sorted into motile siblings (C; *chrnd*<sup>+/?</sup> 97/132 = 73.5%) and immotile mutants (D; *chrnd*<sup>sb13/sb13</sup> 35/132 = 26.5%). Movement was quantified from videos as measured displacement ( $d$ ) of tail as shown (B-D, right panels) in superimposed stills of single fish before stimulation (black image) and at maximum displacement (false-coloured red image). Unanaesthetized motile fish move extensively, generally out of the field of view (indicated by break in Y-axis). Fish were measured before tricaine exposure, after exposure to 0.61 mM tricaine for 30 min and after  $\leq$ 30 minutes of tricaine washout into fish water. Note altered Y-scale in D compared to B,C. **E.** Comparison of mutants with tricaine-treated individuals reveals a striking similarity in displacement. Error bars are SEM. Numbers of embryos are shown on bars. Scale bars = 0.1 mm. doi:10.1371/journal.pone.0103751.g001

movement [18,44]. Adding tricaine to wild type or non-mutant *fixe* sibling larvae at the concentration widely used for anaesthetizing zebrafish (0.61 mM; 160 mg/L)[42] completely inhibited movement in response to touch, water flow or vibration (data not shown). However, tricaine did not block motility evoked by electrical stimulation (Movie S1). Strikingly, the contraction/relaxation timecourse and maximal displacement in anaesthetised fish was indistinguishable from that evoked in *fixe* mutants (Fig. 1E). The action of tricaine was fully reversible, as fish regained normal movement after washout of the anaesthetic (Fig. 1B,C). We conclude that tricaine anaesthesia does not prevent action potentials, excitation-contraction coupling or actomyosin contractility in zebrafish muscle fibres. We observed no difference in measured movements between wild type and non-mutant *fixe* siblings; we continued our experiments with *fixe* siblings.

Given that both tricaine and loss of acetylcholine receptors had the same effect of blocking the neurally-induced escape response but not electric stimulation-evoked motility, we predicted no effect of adding tricaine to *fixe* mutants. Strikingly, however, we consistently observed a reduction in evoked motility (Movie S1 and Fig. 1D). Again, the effect was reversible upon washout of tricaine. These observations confirmed that muscle fibres are resistant to the suppression of action potentials by tricaine, but further suggested that tricaine does act weakly on muscle fibre ion channels, at least those present in immotile *fixe* mutants. To test

this hypothesis, higher doses of tricaine were applied to wild type or *fixe* sibling larvae. Motility gradually declined at successively higher doses until it was essentially inhibited by 3.2 mM tricaine (Fig. 2A and data not shown). In high dose tricaine, *fixe* mutants did not move detectably in response to stimulation, whereas their siblings still showed very slight twitches that caused negligible tail displacement (Movies S1). Thus, tricaine can directly inhibit striated muscle contraction, but functionally denervated muscle appears more sensitive to tricaine than muscle in unmanipulated larvae.

Why is muscle resistant to doses of tricaine that act as a general anaesthetic? One hypothesis is that the voltage-gated channels in skeletal muscle are distinct from those inhibited by tricaine in the nervous system. As  $\text{Na}_v$  channels are known to be major targets of tricaine in neurons [18], we asked whether action potentials in larval muscle are  $\text{Ca}^{++}$ -based and thus have reduced sensitivity to tricaine. Nifedipine is a calcium channel blocker used to test the role of  $\text{Ca}_v$  channels in generation of action potential [45]. Application of Nifedipine (0.1 mM) reduced the movement of unanaesthetised fish (data not shown). At higher concentrations (0.5 mM) nifedipine reduced movement significantly but less effectively than tricaine (Fig. 2B). Fish incubated in both 0.5 mM Nifedipine and 0.61 mM tricaine for 30 minutes showed no significant difference from fish treated with tricaine alone (Fig. 2B). When the drugs were washed out with fish water, movement returned to the level elicited by nifedipine alone, consistent with

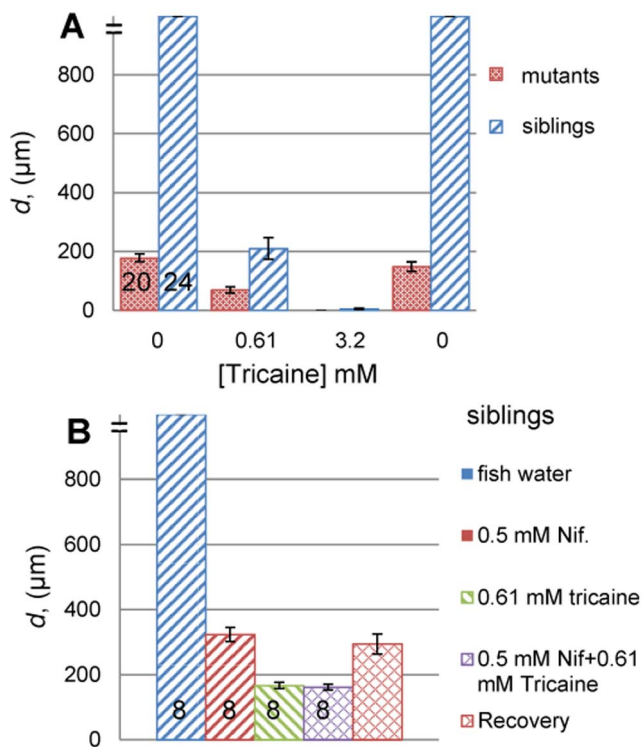

**Figure 2. Tricaine blocks muscle contraction at high concentrations.** **A.** Comparison of tail displacement ( $d$ ) as a function of successively increasing tricaine concentration in *fixe* mutants and their siblings. In both cases, full movement is regained upon tricaine wash-out to fish water. **B.** Tail displacement in response to L-type  $\text{Ca}_v$  channel blocker Nifedipine alone, tricaine alone, or both, and after wash-out of both drugs (right hand bar). Error bars are SEM. Numbers of embryos are shown on bars.

doi:10.1371/journal.pone.0103751.g002

the known irreversible action of nifedipine [46,47]. Nifedipine did not reduce motility in *fixe* mutants (data not shown). These results suggest that nifedipine-sensitive L-type  $\text{Ca}_v$  channels are functional in neurons of the motor pathway, but do not significantly contribute within the muscle itself.

## Discussion

There are four major results from the current study. First, a simple and custom built electric stimulation set-up shows that larval zebrafish muscle contraction can be directly evoked using external electric stimuli. Second, that tricaine anaesthesia at normal doses prevents movement by effectively inhibiting neural but not skeletal muscle action potentials. Thirdly, tricaine at higher concentrations also blocks muscle action potentials, probably via effects on  $\text{Na}_v$  channels. Lastly, nifedipine-sensitive L-type voltage-gated calcium channels also act in the nervous system but appear to have little direct action within zebrafish muscle to promote contraction.

Movements in skeletal muscle can be elicited either by neurons (natural movement) or by external electrical stimulation (evoked movement, EES), in which muscle plasma membrane depolarization caused by the applied voltage triggers an action potential. In the current study, we show that EES can initiate contraction in mutants that lack the acetylcholine receptor delta subunits and therefore cannot receive natural input from motorneurons [41]. EES as used here triggers brief sub-tetanic contractions; ramping

the voltage beyond 20 V caused more forceful movements (unpublished observations). EES will enable future studies of the impact of muscle electrical activity on gene expression and growth.

Amino amide anaesthetics are known to block  $\text{Na}_v$  channels and thus block the conduction of action potentials in excitable cells [18]. Tricaine is the most commonly used anaesthetic agent for zebrafish. Tricaine is structurally similar to the anaesthetic agents procaine, bupivacaine and lidocaine. These anaesthetics also bind reversibly to  $\text{Na}_v$  channels, blocking  $\text{Na}^+$  movement through the channels, but can also affect other channels [38]. We were able to evoke muscle contraction in fish incubated in tricaine. The magnitude of contraction was similar to that evoked in mutants lacking transmission at the neuromuscular junction. We interpret these observations to show that tricaine does not prevent action potentials in skeletal muscle fibres, whereas action potentials in nerve cells are effectively prevented, leading to general anaesthesia. This finding is important for considerations of animal husbandry; although fish appear to detect and avoid tricaine [23,28], our data show that tricaine works preferentially at the neural, rather than muscular, level of control of movement. Although questions remain on the most appropriate agents for fish anaesthesia [22], our study shows that tricaine at standard concentrations does not act as a paralytic neuromuscular blocking agent in zebrafish.

Of the known  $\text{Na}_v$  channel alpha subunit genes, only *scn4aa* and *scn4ab* are expressed in zebrafish skeletal muscle around 3 dpf [30-32]. It seems that channels made with these subunits ( $\text{Na}_v1.4$ ) may be less sensitive to tricaine than those made with classical neural homologues, such as *scn1a* ( $\text{Na}_v1.1$ ) and *scn8a* ( $\text{Na}_v1.6$ ) subunits. The  $\text{Na}_v1.5$  channel alpha subunit gene (*scn12ab* in zebrafish) appears to be expressed transiently in early developing slow muscle fibres, but may become restricted to cardiac muscle later [30,31]. The murine  $\text{Na}_v1.5$  channel is up-regulated in skeletal muscle on denervation [48]. It is therefore possible that the effectiveness of tricaine in inhibiting evoked movement in *fixe* mutants reflects up-regulation of similar channels sensitive to tricaine in inactive somitic muscle. Indeed, mammalian  $\text{Na}_v1.5$  appears several fold more sensitive than  $\text{Na}_v1.4$  to lidocaine [29]. However, the ineffectiveness of tricaine to silence embryonic zebrafish heart demonstrates that the major cardiac  $\text{Na}_v$  channel expressed at early stages (*scn12aa* [31]) is not particularly tricaine sensitive. Interestingly, the heart becomes more sensitive to tricaine as the fish matures, perhaps correlating with increasing predominance of expression of *scn12ab* in the myocardium [27,49]. Electrophysiological studies of isolated zebrafish channels are required to resolve these issues.

Higher concentrations of tricaine largely inhibit evoked muscle contraction, suggesting either that muscle action potentials can be prevented by this drug or that tricaine may affect channels involved in excitation-contraction coupling. The simplest explanation appears to be that the  $\text{Na}_v1.4$  channels are inhibited by high dose tricaine. Alternatively,  $\text{Ca}_v$  channels contain alpha subunits with structural similarity to  $\text{Na}_v$  channels [2,12]. As developing muscle has been reported to have  $\text{Ca}_v$  channels capable of supporting a  $\text{Ca}^{++}$ -based action potential [12], these could be targets of high dose tricaine. The *cacna1sa* channel thought to be a muscle-specific subunit of the DHPR is expressed in zebrafish somitic muscle [40]. So high dose tricaine might block excitation-contraction coupling directly.

We addressed the idea of  $\text{Ca}^{++}$ -based action potentials directly, but failed to find evidence in favour of this possibility. Specialised L-type  $\text{Ca}_v$  channels can be blocked by nifedipine [50]. We found that nifedipine inhibits CNS function in zebrafish larvae, leading to reduced movement. However, nifedipine had no effect on the

residual motility present in tricaine-treated larvae, indicating that neither evoked action potentials, nor the DHPR, were blocked by this drug. These findings argue that L-type  $Ca_v$  channels are not responsible for the resistance of zebrafish muscle to normal doses of tricaine.

## Supporting Information

**Movie S1 Movement of wild type (wt), *fixe* mutants (*chrnd<sup>sb13/sb13</sup>*) or *fixe* sibling (*chrnd<sup>sb13/+</sup>* or *chrnd<sup>+/+</sup>*) fish in response to EES.** Fish were treated with the water control or tricaine at standard or fivefold dose, as indicated before each clip. A pulse train of 0.1 s duration was applied every 5 seconds. Movie is sped up about 2.5-fold for ease of viewing. Note increased movement in response to the first pulse, possibly

reflecting the need for channel activation for tricaine to bind to  $Na_v$  channels. Heartbeat shows all fish are alive. In '*fixe* + 5X tricaine' clip, heartbeat shows fish are alive but fail to respond to stimulation.

(MP4)

## Acknowledgments

We thank members of the Hughes lab for help and advice during the work.

## Author Contributions

Conceived and designed the experiments: SA SMH. Performed the experiments: SA. Analyzed the data: SA SMH. Contributed to the writing of the manuscript: SA SMH.

## References

- Galvani A (1791) De viribus electricitatis in motu musculari commentarius. Bologna: Accademia delle Scienze. Eprint 2000 The International Centre for the History of Universities and Science (CIS), Università di Bologna.
- Catterall WA (2014) Structure and function of voltage-gated sodium channels at atomic resolution. *Experimental Physiology* 99: 35–51.
- Ebashi S, Endo M (1968) Calcium ion and muscle contraction. *Prog Biophys Mol Biol* 18: 123–183.
- Matthews GG (2003) *Cellular Physiology of Nerve and Muscle*. Oxford: Blackwell Science Ltd.
- Maffioletti NA, Roig M, Karatzanos E, Nanas S (2013) Neuromuscular electrical stimulation for preventing skeletal-muscle weakness and wasting in critically ill patients: a systematic review. *BMC Med* 11: 137.
- Salmons S, Sreter FA (1976) Significance of impulse activity in the transformation of skeletal muscle type. *Nature* 263: 30–34.
- Pette D, Vrbová G (1999) What does chronic electrical stimulation teach us about muscle plasticity? *Muscle Nerve* 22: 666–677.
- Windisch A, Gundersen K, Szabolcs MJ, Gruber H, Lomo T (1998) Fast to slow transformation of denervated and electrically stimulated rat muscle. *J Physiol (Lond)* 510: 623–632.
- Hodgkin AL, Huxley AF (1952) A quantitative description of membrane current and its application to conduction and excitation in nerve. *J Physiol* 117: 500–544.
- Armstrong CM, Hille B (1998) Voltage-gated ion channels and electrical excitability. *Neuron* 20: 371–380.
- Chen R, Chung SH (2014) Mechanism of tetrodotoxin block and resistance in sodium channels. *Biochem Biophys Res Commun* 446: 370–374.
- Catterall WA (2011) Voltage-Gated Calcium Channels. *Cold Spring Harbor Perspectives in Biology* 3.
- Couchoux H, Allard B, Legrand C, Jacquemond V, Berthier C (2007) Loss of caveolin-3 induced by the dystrophy-associated P104L mutation impairs L-type calcium channel function in mouse skeletal muscle cells. *The Journal of Physiology* 580: 745–754.
- Strube C, Tourneur Y, Ojeda C (2000) Functional expression of the L-type calcium channel in mice skeletal muscle during prenatal myogenesis. *Biophys J* 78: 1282–1292.
- Lacinova L (2005) Voltage-dependent calcium channels. *Gen Physiol Biophys* 24 Suppl 1: 1–78.
- Wang GK, Calderon J, Wang SY (2008) State- and use-dependent block of muscle Nav1.4 and neuronal Nav1.7 voltage-gated  $Na^+$  channel isoforms by ranolazine. *Mol Pharmacol* 73: 940–948.
- Yamakage M, Namiki A (2002) Calcium channels - basic aspects of their structure, function and gene encoding; anesthetic action on the channels - a review. *Canadian Journal of Anaesthesia-Journal Canadien D Anesthésie* 49: 151–164.
- Nau C, Wang GK (2004) Interactions of local anesthetics with voltage-gated  $Na^+$  channels. *J Membr Biol* 201: 1–8.
- Butterworth JF, Strichartz GR (1990) Molecular mechanisms of local anesthesia: a review. *Anesthesiology* 72: 711–734.
- Dahm R, Geisler R (2006) Learning from small fry: The zebrafish as a genetic model organism for aquaculture fish species. *Marine Biotechnology* 8: 329–345.
- Skromne I, Prince VE (2008) Current perspectives in zebrafish reverse genetics: moving forward. *Dev Dyn* 237: 861–882.
- Zahl I-H, Samuelsen O, Kiessling A (2012) Anaesthesia of farmed fish: implications for welfare. *Fish Physiology and Biochemistry* 38: 201–218.
- Readman GD, Owen SF, Murrell JC, Knowles TG (2013) Do fish perceive anaesthetics as aversive? *PLoS ONE* 8: e73773.
- Späth M, Schweickert W (1997) The effect of metacaine (MS-222) on the activity of the efferent and afferent nerves in the teleost lateral-line system. *Naunyn-Schmiedeberg's Archives of Pharmacology* 297: 9–16.
- Svoboda KR, Linares AE, Ribera AB (2001) Activity regulates programmed cell death of zebrafish Rohon-Beard neurons. *Development* 128: 3511–3520.
- Hedrick MS, Winmill RE (2003) Excitatory and inhibitory effects of tricaine (MS-222) on fictive breathing in isolated bullfrog brain stem. *American Journal of Physiology - Regulatory, Integrative and Comparative Physiology* 284: R405–R412.
- Huang WC, Hsieh YS, Chen IH, Wang CH, Chang HW, et al. (2010) Combined Use of MS-222 (Tricaine) and Isoflurane Extends Anesthesia Time and Minimizes Cardiac Rhythm Side Effects in Adult Zebrafish. *Zebrafish* 7: 297–304.
- Wong D, von Keyserlingk MAG, Richards JG, Weary DM (2014) Conditioned Place Avoidance of Zebrafish *Danio rerio* to Three Chemicals Used for Euthanasia and Anaesthesia. *PLoS ONE* 9: e88030.
- Nuss HB, Tomaselli GF, Marbán E (1995) Cardiac sodium channels (hH1) are intrinsically more sensitive to block by lidocaine than are skeletal muscle ( $\mu 1$ ) channels. *The Journal of General Physiology* 106: 1193–1209.
- Chopra SS, Stroud DM, Watanabe H, Bennett JS, Burns CG, et al. (2010) Voltage-gated sodium channels are required for heart development in zebrafish. *Circ Res* 106: 1342–1350.
- Novak AE, Taylor AD, Pineda RH, Lasda EL, Wright MA, et al. (2006) Embryonic and larval expression of zebrafish voltage-gated sodium channel alpha-subunit genes. *Dev Dyn* 235: 1962–1973.
- Venkatesh B, Lu SQ, Dandona N, See SL, Brenner S, et al. (2005) Genetic basis of tetrodotoxin resistance in pufferfishes. *Curr Biol* 15: 2069–2072.
- Shang LL, Dudley SC Jr (2005) Tandem promoters and developmentally regulated 5'- and 3'-mRNA untranslated regions of the mouse *Scn5a* cardiac sodium channel. *J Biol Chem* 280: 933–940.
- Catterall WA, Goldin AL, Waxman SG (2005) International Union of Pharmacology. XLVII. Nomenclature and structure-function relationships of voltage-gated sodium channels. *Pharmacol Rev* 57: 397–409.
- Oyama Y, Sadoshima J, Tokutomi N, Akaike N (1988) Some properties of inhibitory action of lidocaine on the  $Ca^{2+}$  current of single isolated frog sensory neurons. *Brain Res* 442: 223–228.
- Josephson IR (1988) Lidocaine blocks  $Na$ ,  $Ca$  and  $K$  currents of chick ventricular myocytes. *J Mol Cell Cardiol* 20: 593–604.
- Carmeliet E, Morad M, Van der Heyden G, Vereecke J (1986) Electrophysiological effects of tetracaine in single guinea-pig ventricular myocytes. *J Physiol* 376: 143–161.
- Scholz A (2002) Mechanisms of (local) anaesthetics on voltage-gated sodium and other ion channels. *Br J Anaesth* 89: 52–61.
- Catterall WA, Perez-Reyes E, Snutch TP, Striessnig J (2005) International Union of Pharmacology. XLVIII. Nomenclature and structure-function relationships of voltage-gated calcium channels. *Pharmacol Rev* 57: 411–425.
- Sanhuesa D, Montoya A, Sierralta J, Kukuljan M (2009) Expression of voltage-activated calcium channels in the early zebrafish embryo. *Zygote* 17: 131–135.
- Etard C, Behra M, Ertzer R, Fischer N, Jesuthasan S, et al. (2005) Mutation in the delta-subunit of the  $nAChR$  suppresses the muscle defects caused by lack of Dystrophin. *Dev Dyn* 234: 1016–1025.
- Westerfield M (2000) *The Zebrafish Book-A guide for the laboratory use of zebrafish (Danio rerio)*.
- Ritter DA, Bhatt DH, Fetcho JR (2001) In vivo imaging of zebrafish reveals differences in the spinal networks for escape and swimming movements. *J Neurosci* 21: 8956–8965.
- Winlow W, Yar T, Spencer G, Girdlestone D, Hancox J (1992) Differential effects of general anaesthetics on identified molluscan neurones in situ and in culture. *Gen Pharmacol* 23: 985–992.
- Toal CB, Meredith PA, Elliott HL (2012) Long-acting dihydropyridine calcium-channel blockers and sympathetic nervous system activity in hypertension: a literature review comparing amlodipine and nifedipine. *GITS. Blood Press* 21 Suppl 1: 3–10.
- Piriz J, Rosato Siri MD, Pagani R, Uchitel OD (2003) Nifedipine-Mediated Mobilization of Intracellular Calcium Stores Increases Spontaneous Neuro-

- transmitter Release at Neonatal Rat Motor Nerve Terminals. *Journal of Pharmacology and Experimental Therapeutics* 306: 658–663.
47. Barry WH, Horowitz JD, Smith TW (1985) Comparison of negative inotropic potency, reversibility, and effects on calcium influx of six calcium channel antagonists in cultured myocardial cells. *British Journal of Pharmacology* 85: 51–59.
  48. Rowan SL, Rygiel K, Purves-Smith FM, Solbak NM, Turnbull DM, et al. (2012) Denervation causes fiber atrophy and myosin heavy chain co-expression in senescent skeletal muscle. *PLoS One* 7: e29082.
  49. Denvir MA, Tucker CS, Mullins JJ (2008) Systolic and diastolic ventricular function in zebrafish embryos: influence of norepinephrine, MS-222 and temperature. *BMC Biotechnol* 8: 21.
  50. Nguemo F, Fleischmann BK, Gupta MK, Saric T, Malan D, et al. (2013) The L-type Ca<sup>2+</sup> channels blocker nifedipine represses mesodermal fate determination in murine embryonic stem cells. *PLoS One* 8: e53407.
